# Supplementary material for: Genome scanning of behavioral selection in a canine olfactory detection breeding cohort
Source: PubMed Central journal article supplement (PMC9440224; doi:10.1038/s41598-022-18698-4), 2022-09-02
Supplement: 41598_2022_18698_MOESM1_ESM.pdf [file 41598_2022_18698_MOESM1_ESM.pdf]

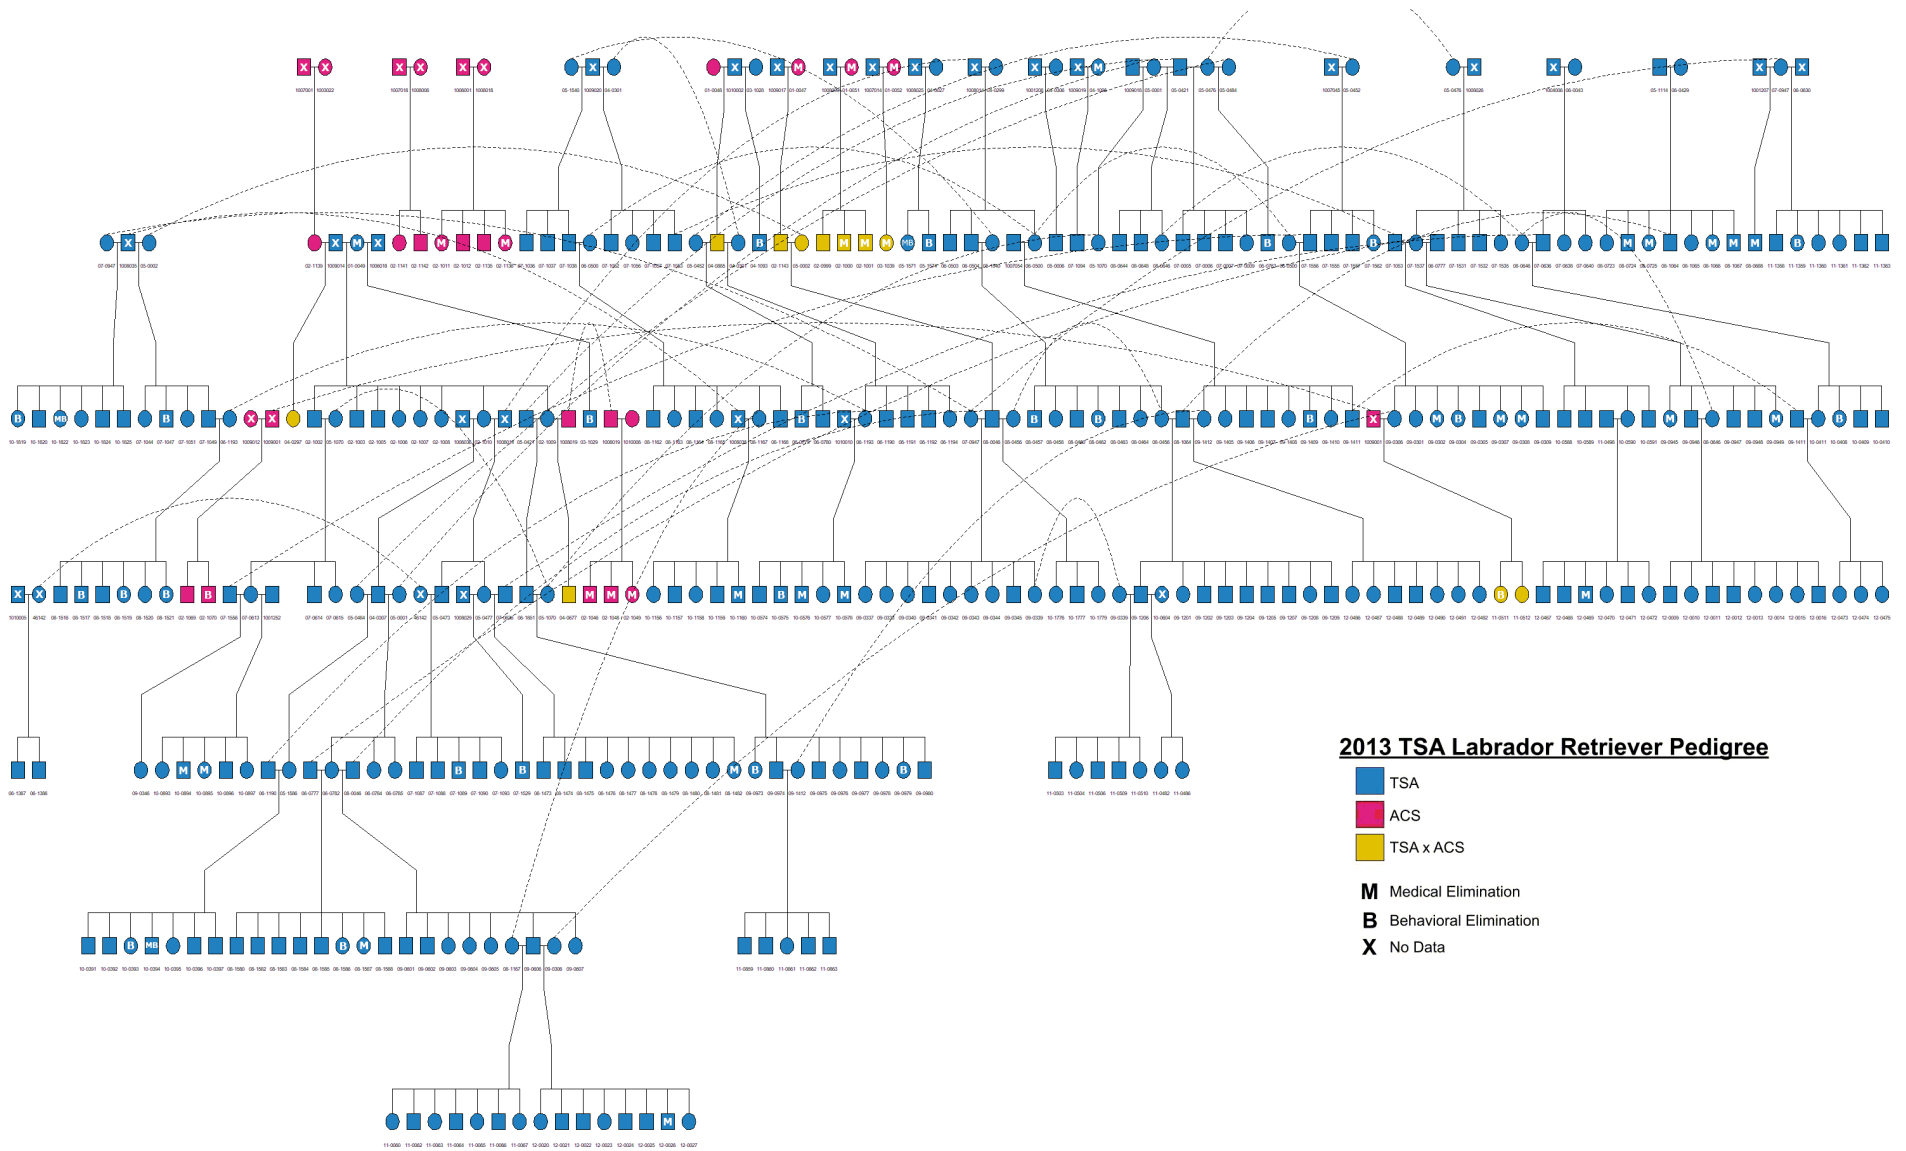

**Figure S1.** Pedigree of this study’s TSA breeding program cohort. ACS dogs refer to dogs sourced from the Australian Customs Service. Dogs are classified for program elimination for medical or behavioral reasons.
